# Supplementary material for: Involvement of B Cells, Immunoglobulins, and Syk in the Pathogenesis of Abdominal Aortic Aneurysm
Source: PubMed Central journal article supplement — J Am Heart Assoc. 2018 Mar 15;7(6):e007750. doi: 10.1161/JAHA.117.007750 (PMC5907549; doi:10.1161/jaha.117.007750), 2018-03-15
Supplement: JAH3-7-e007750-s005.pdf [file JAH3-7-e007750-s005.pdf]

# **SUPPLEMENTAL MATERIAL**

**Table S1. Expression analysis of apoptosis-related genes.** Expression of apoptosis-related genes as determined by DNA microarray are shown, which correspond to the top panel of Figure 6. See Excel file.

**Table S2. Expression analysis of cell cycle-related genes.** Expression of cell cycle-related genes as determined by DNA microarray are shown, which correspond to the second panel of Figure 6. See Excel file.

**Table S3. Expression analysis of inflammatory response-related genes.** Expression of inflammatory response-related genes as determined by DNA microarray are shown, which correspond to the third panel of Figure 6. See Excel file.

**Table S4. Expression analysis of matrix metalloproteinase genes.** Expression of genes for matrix metalloproteinases as determined by DNA microarray are shown, which correspond to the bottom panel of Figure 6. See Excel file.
